# Supplementary material for: Systematic Identification and Validation of Suitable Reference Genes for the Normalization of Gene Expression in Prunella vulgaris under Different Organs and Spike Development Stages
Source: MDPI journal article supplement (doi:10.3390/genes13111947), 2022-10-25
Supplement: s1 [file s1]

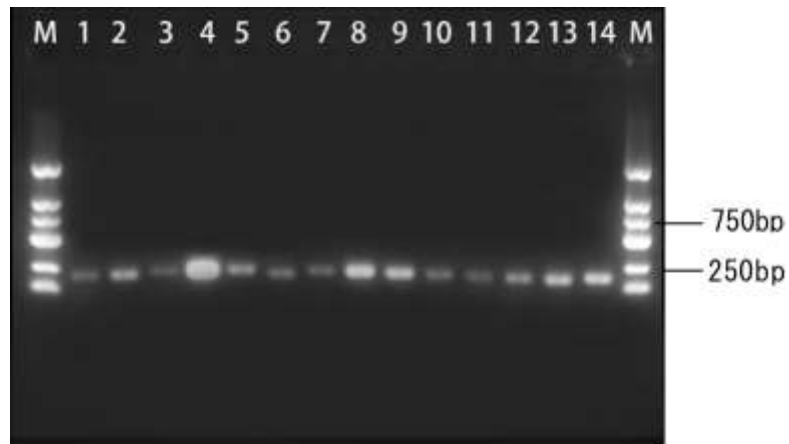

**Figure S1.** qPCR amplification specificity of 14 candidate reference genes. Amplification fragments were separated by 1.5% agarose gel electrophoresis.  
 1: *ACT7*; 2: *ACT12*; 3: *ACT1*; 4: *18S rRNA*; 5: *eIF-3*; 6: *eIF4A-3*; 7: *eIF-2*; 8: *His3.3*; 9: *TUA6*; 10: *CYP38*; 11: *PP2A-2*; 12: *PP2A-3*; 13: *PP2A-4*; 14: *VAB2*; M: Marker 2K.

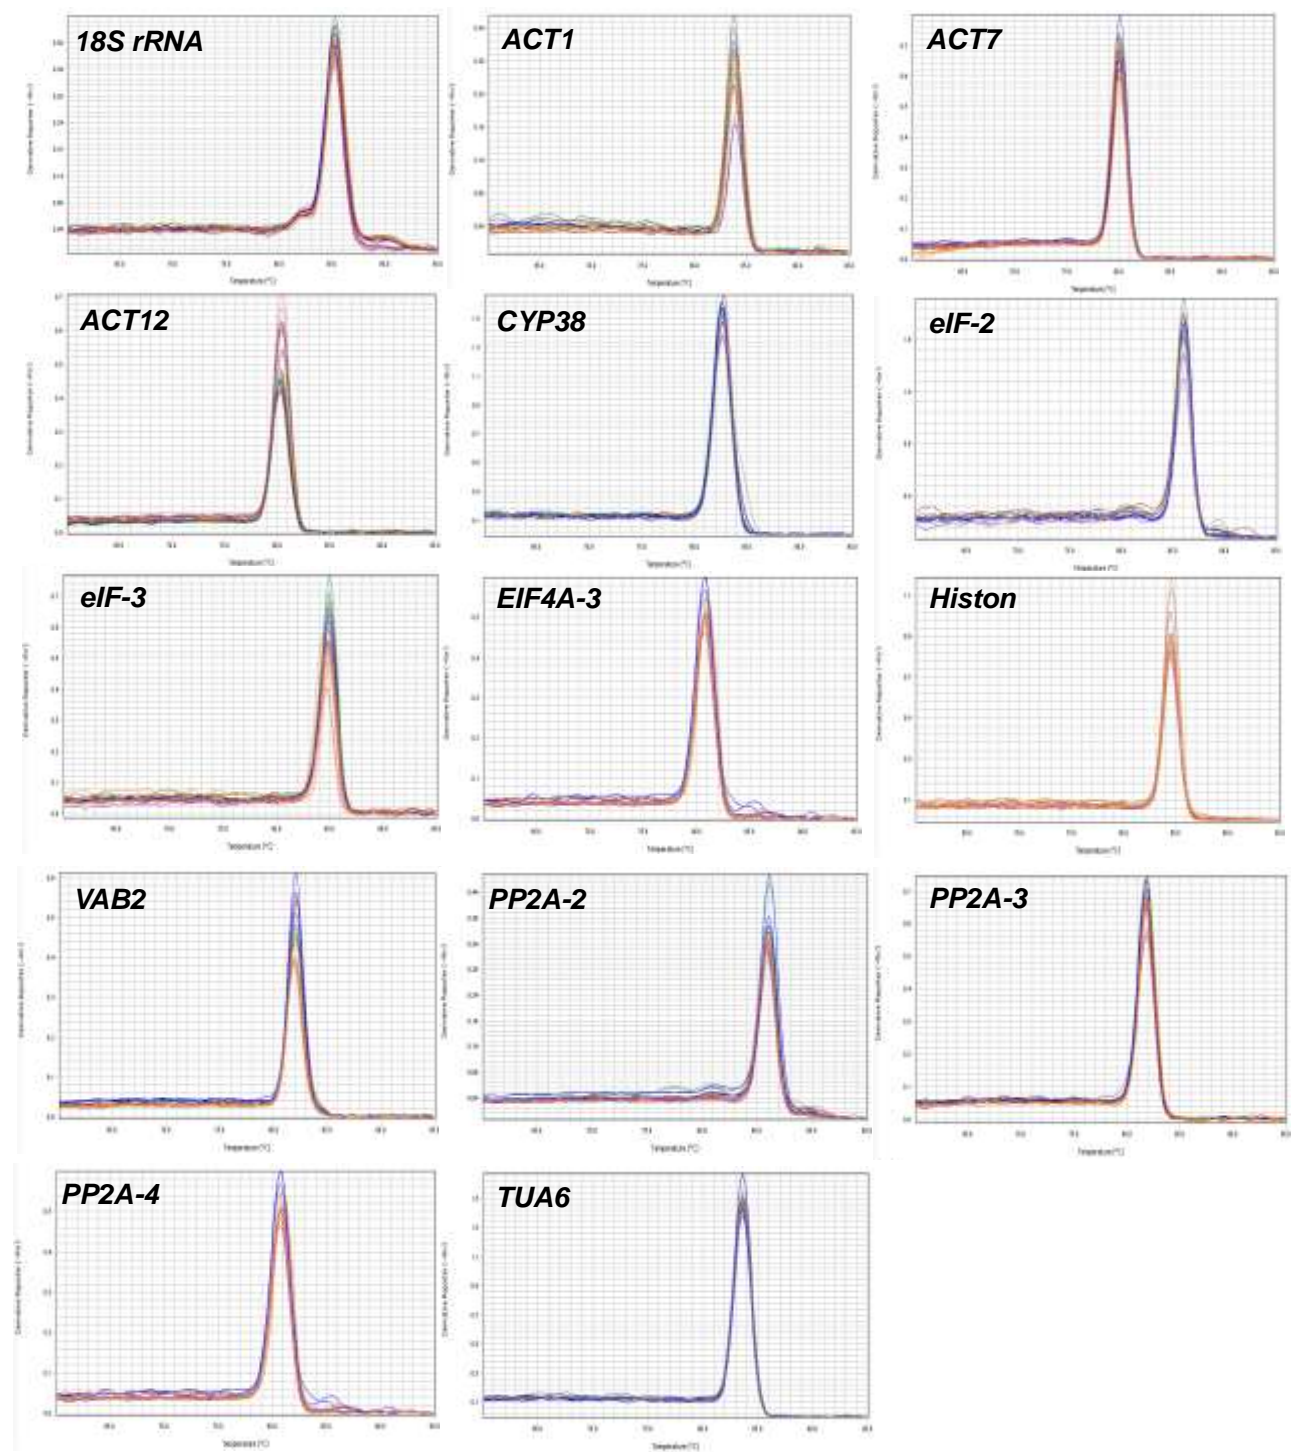

Fig. S2 Melt curves for the 14 candidate reference genes

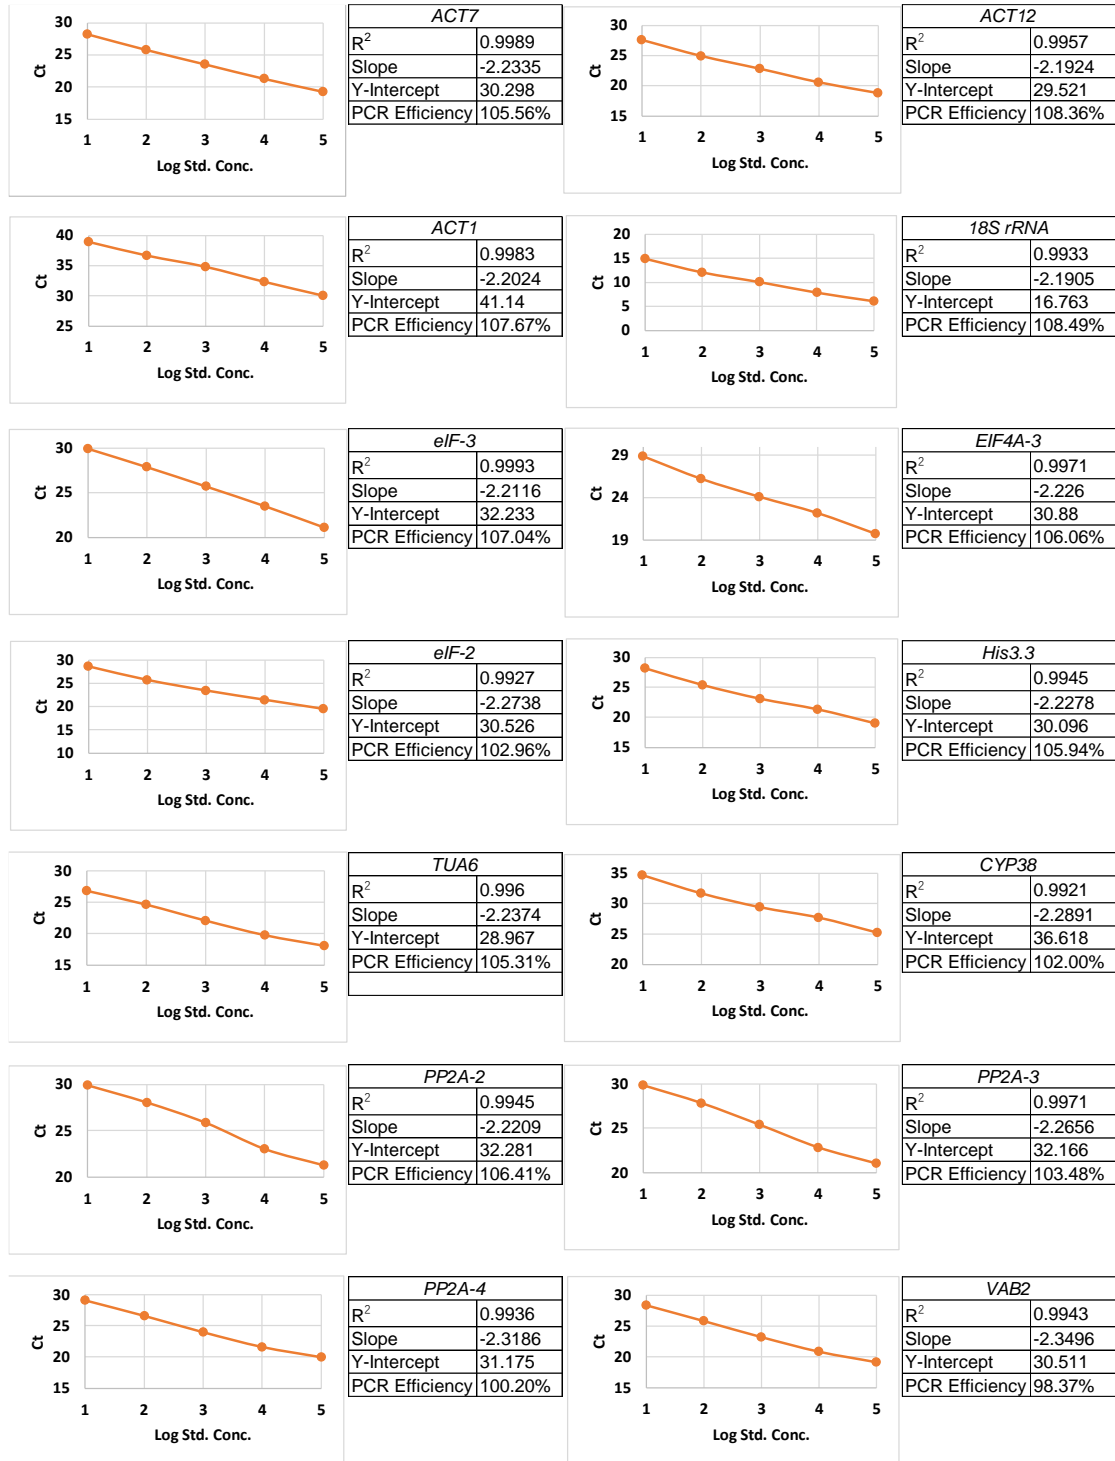

Fig. S3 Standard curves of the 14 candidate reference
